# Supplementary material for: Physical injuries as triggers for self-harm: a within-individual study of nearly 250 000 injured people with a major psychiatric disorder
Source: HighWire-hosted journal article supplement (doi:10.1136/bmjment-2023-300758), 2023-06-01
Supplement: bmjment-2023-300758supp001_data_supplement.pdf [file bmjment-2023-300758supp001_data_supplement.pdf]

### eText 1. Validity of diagnoses of psychiatric disorders and physical injuries

Reviews of the inpatient registers in both countries have reported excellent validity with positive predictive values (PPVs) for most diagnoses ranging between 85-95% in Sweden and 75-99% in Finland.<sup>1,2</sup> Validity studies of single-episode diagnoses have demonstrated excellent validity for schizophrenia spectrum disorders (Sweden:  $\kappa=0.86$ ;<sup>3</sup> Finland:  $PPV \geq 0.84$ <sup>2</sup>) and bipolar disorder (Sweden: concordance rate of 86% compared to file reviews by psychiatrists<sup>4</sup>; Finland: PPV range between 87-93%<sup>5</sup>). The validity of single-episode depression diagnoses has similarly been shown to be fair to moderate in Sweden when tested against clinical forensic registers ( $\kappa=0.31$ , 88% full agreement)<sup>6</sup> and good in Finland when compared to researcher assessments ( $\kappa=0.65$ ,  $PPV=0.81$ ).<sup>7</sup> Individuals in the general population were defined as those who had never been diagnosed with a psychiatric disorder, with the exception of substance use disorder.

Although broader measures of injury-related diagnoses have been found to have excellent validity in both Sweden and in Finland ( $PPVs > 90\%$ ),<sup>1,2</sup> we are unaware of any studies that have focused on specific injury types.

### References

- 1 Ludvigsson J, Andersson E, Ekblom A, *et al.* External review and validation of the Swedish national inpatient register. *BMC Public Health* 2011; **11**: 450.
- 2 Sund R. Quality of the Finnish Hospital Discharge Register: A systematic review. *Scandinavian Journal of Public Health* 2012; **40**: 505–15.
- 3 Fazel S, Långström N, Hjern A, Grann M, Lichtenstein P. Schizophrenia, substance abuse, and violent crime. *JAMA* 2009; **301**: 2016.
- 4 Sellgren C, Landén M, Lichtenstein P, Hultman CM, Långström N. Validity of bipolar disorder hospital discharge diagnoses: file review and multiple register linkage in Sweden. *Acta Psychiatrica Scandinavica* 2011; **124**: 447–53.
- 5 Kieseppä T, Partonen T, Kaprio J, Lönnqvist J. Accuracy of register- and record-based bipolar I disorder diagnoses in Finland; a study of twins. *Acta Neuropsychiatr* 2000; **12**: 106–9.
- 6 Fazel S, Wolf A, Chang Z, Larsson H, Goodwin GM, Lichtenstein P. Depression and violence: a Swedish population study. *Lancet Psychiatry* 2015; **2**: 224–32.

7 Taiminen T, Ranta K, Karlsson H, *et al.* Comparison of clinical and best-estimate research DSM-IV diagnoses in a Finnish sample of first-admission psychosis and severe affective disorder. *Nordic Journal of Psychiatry* 2001; **55**: 107–11.

## **eText 2. Complementary sensitivity analyses**

First, to test for the generalizability of the findings across both countries, we compared the pooled estimates with equivalent country-specific estimates (**eTable 4**). To test for potential within-month seasonality bias, we re-ran the analyses in a new sample where the start dates of the 7-day control periods were randomly moved forward between 0 and 14 days (**eTable 5**). Similarly, we tested for the potential bias of selecting control periods that had occurred prior to the trigger exposure by considering equivalent control periods that had occurred up to three years after the trigger event (**eTable 6**). We further considered the impact of reducing the number of control periods down to 12 months (**eTable 7**) and to only consider the first trigger event (**eTable 8**). We also tested for alternative definitions of the psychiatric disorders (e.g., at least two diagnoses on separate occasions and excluding diagnoses being given in outpatient care settings; **eTable 9**) and outcome (i.e., suicidal behaviours; **eTable 10**). We further tested for the impact of reverse causation bias by removing trigger and control periods that had been preceded by self-harm in the last three months (**eTable 11**) and left-truncation bias by restricting the cohorts to those who were 12 years old or younger when the self-harm data were made available (Finland: 1975-2000; Sweden: 1961-1993; **eTable 12**). Lastly, we tested whether excluding self-harm events of undetermined intent altered our findings (**eTable 13**).

eTable 1. ICD codes

|                                                               | ICD-8             | ICD-9                                | ICD-10                              |
|---------------------------------------------------------------|-------------------|--------------------------------------|-------------------------------------|
| <b>Any psychiatric disorder</b>                               | 290-315           | 290-319                              | F00-F99                             |
| <b>Substance use disorder (used as an exclusion criteria)</b> |                   |                                      |                                     |
| Finland                                                       | 291, 303, 304     | 291, 292, 303, 304, 305 [excl. *.1]  | F10-F12, F14-F16, F19 [excl. F1*.5] |
| Sweden                                                        | 291, 303, 304     | 291, 292, 303, 304, 305A, 305X       | F10-F12, F14-F16, F19 [excl. F1*.5] |
| <b>Schizophrenia-spectrum disorder</b>                        | 295, 297-299      | 295, 297-298                         | F20-F29                             |
| <b>Bipolar disorder</b>                                       |                   |                                      |                                     |
| Finland                                                       | 296 [excl. 296.2] | 296 [excl. 296.1A-D, 296.1F-G]       | F30-F31                             |
| Sweden                                                        | 296 [excl. 296.2] | 296 [excl. 296B]                     | F30-F31                             |
| <b>Depression</b>                                             |                   |                                      |                                     |
| Finland                                                       | 296.2, 300.4      | 296.1 [excl. 296.1E], 296.8A, 300.4A | F32-F39 [excl. F32.3 and F33.3]     |
| Sweden                                                        | 296.2, 300.4      | 296B, 300E, 311                      | F32-F39 [excl. F32.3 and F33.3]     |
| <b>Fall-related injury</b>                                    |                   |                                      |                                     |
| Finland                                                       | -                 | E880-E889                            | W00-W19                             |
| Sweden                                                        | E880-E887         | E880-E888                            | W00-W19                             |
|                                                               |                   |                                      |                                     |

|                                                                         |                         |                             |                                                                                                                                                                                  |
|-------------------------------------------------------------------------|-------------------------|-----------------------------|----------------------------------------------------------------------------------------------------------------------------------------------------------------------------------|
| <b>Transport-related injury</b>                                         |                         |                             |                                                                                                                                                                                  |
| Finland                                                                 | -                       | E800-E830A                  | V01-V99                                                                                                                                                                          |
| Sweden                                                                  | E807-E846               | E800-E849                   | V01-V99                                                                                                                                                                          |
| <b>Traumatic brain injury</b>                                           | 800-804,<br>850-854     | 800-804,<br>850-854         | S01.0-S01.9, S02.0, S02.1, S02.3, S02.7-S02.9, S04.0, S06.0-S06.9, S07.0, S07.1, S07.8, S07.9, S09.7-S09.9, T01.0, T02.0, T04.0, T06.0, T90.1, T90.2, T90.4, T90.5, T90.8, T90.9 |
| <b>Injury from interpersonal assault</b>                                | E960-E969               | E960-E969                   | X85-X99,<br>Y00-Y09                                                                                                                                                              |
| <b>Suicidal behaviour (self-harm and/or suicide)</b>                    | 851-854                 | 851-854                     |                                                                                                                                                                                  |
| Finland                                                                 | -                       | E950A-E959X,<br>E970A-E979A | X60-X84,<br>Y10-Y34                                                                                                                                                              |
| Sweden                                                                  | E950-E959,<br>E980-E989 | E950-E959,<br>E980-E989     | X60-X84,<br>Y10-Y34                                                                                                                                                              |
| <b>Self-harm of undetermined intent (used as an exclusion criteria)</b> |                         |                             |                                                                                                                                                                                  |
| Finland                                                                 | -                       | E970A-E979A                 | Y10-Y34                                                                                                                                                                          |
| Sweden                                                                  | E980-E989               | E980-E989                   | Y10-Y34                                                                                                                                                                          |

**eTable 2. Number of observations in person-weeks and rates of suicidal behaviours per 10,000 person-weeks across all periods, control periods and periods following each trigger**

|                                                 | Schizophrenia-spectrum disorder |                   | Bipolar disorder |                   | Depression   |                   | No psychiatric disorders |                  |
|-------------------------------------------------|---------------------------------|-------------------|------------------|-------------------|--------------|-------------------|--------------------------|------------------|
|                                                 | Observations                    | Rate [95% CI]     | Observations     | Rate [95% CI]     | Observations | Rate [95% CI]     | Observations             | Rate [95% CI]    |
| <b><i>Fall-related injury</i></b>               |                                 |                   |                  |                   |              |                   |                          |                  |
| All periods                                     | 1,788,010                       | 14.4 [13.9; 15.0] | 1,028,294        | 11.7 [11.0; 12.4] | 6,145,348    | 6.1 [5.9; 6.3]    | 54,255,361               | 0.5 [0.5; 0.5]   |
| Control periods                                 | 1,709,463                       | 13.5 [12.9; 14.0] | 983,923          | 11.1 [10.4; 11.8] | 5,875,476    | 5.7 [5.5; 5.9]    | 52,124,783               | 0.4 [0.4; 0.4]   |
| Following trigger                               | 78,547                          | 34.8 [30.8; 39.1] | 44,371           | 25.0 [20.6; 30.1] | 269,872      | 15.3 [13.8; 16.8] | 2,130,578                | 2.7 [2.4; 2.9]   |
|                                                 |                                 |                   |                  |                   |              |                   |                          |                  |
| <b><i>Transport-related injury</i></b>          |                                 |                   |                  |                   |              |                   |                          |                  |
| All periods                                     | 616,219                         | 10.4 [9.6; 11.2]  | 382,319          | 10.0 [9.0; 11.0]  | 2,305,366    | 5.3 [5.0; 5.6]    | 19,752,339               | 0.5 [0.5; 0.5]   |
| Control periods                                 | 591,214                         | 9.7 [8.9; 10.5]   | 366,746          | 9.2 [8.3; 10.3]   | 2,206,143    | 5.0 [4.7; 5.3]    | 19,022,005               | 0.4 [0.4; 0.4]   |
| Following trigger                               | 25,005                          | 26.8 [20.8; 34.0] | 15,573           | 27.6 [20.0; 37.2] | 99,223       | 12.4 [10.3; 14.8] | 730,334                  | 2.8 [2.4; 3.2]   |
|                                                 |                                 |                   |                  |                   |              |                   |                          |                  |
| <b><i>Traumatic brain injury</i></b>            |                                 |                   |                  |                   |              |                   |                          |                  |
| All periods                                     | 1,073,411                       | 14.0 [13.3; 14.8] | 558,967          | 13.3 [12.4; 14.3] | 3,128,254    | 7.5 [7.2; 7.9]    | 20,323,253               | 0.7 [0.6; 0.7]   |
| Control periods                                 | 1,032,080                       | 13.1 [12.4; 13.8] | 538,776          | 12.4 [11.5; 13.4] | 3,005,817    | 7.0 [6.7; 7.3]    | 19,666,398               | 0.5 [0.5; 0.6]   |
| Following trigger                               | 41,331                          | 37.5 [31.8; 43.9] | 20,191           | 37.6 [29.7; 47.1] | 122,437      | 19.8 [17.4; 22.5] | 656,855                  | 4.4 [3.9; 5.0]   |
|                                                 |                                 |                   |                  |                   |              |                   |                          |                  |
| <b><i>Injury from interpersonal assault</i></b> |                                 |                   |                  |                   |              |                   |                          |                  |
| All periods                                     | 439,375                         | 21.2 [19.9; 22.6] | 218,099          | 19.8 [17.9; 21.7] | 1,136,691    | 12.8 [12.1; 13.4] | 4,279,902                | 1.5 [1.4; 1.6]   |
| Control periods                                 | 423,646                         | 20.2 [18.9; 21.6] | 210,596          | 18.6 [16.8; 20.5] | 1,096,598    | 11.9 [11.3; 12.6] | 4,147,447                | 1.2 [1.1; 1.3]   |
| Following trigger                               | 15,729                          | 48.3 [38.1; 60.4] | 7503             | 52.0 [37.0; 71.0] | 40,093       | 36.7 [31.0; 43.1] | 132,455                  | 11.1 [9.4; 13.0] |

Notes: The psychiatric disorders were defined hierarchically.

eTable 3. Sensitivity test: Age-specific estimates

|                                         | All ages<br>(reference) | Ages 12-19<br>years | Ages 20-29<br>years | Ages 30-39<br>years | Ages 40-49<br>years | Ages 50 years<br>or older |
|-----------------------------------------|-------------------------|---------------------|---------------------|---------------------|---------------------|---------------------------|
|                                         | aOR [95% CI]            | aOR [95% CI]        | aOR [95% CI]        | aOR [95% CI]        | aOR [95% CI]        | aOR [95% CI]              |
| <b>Schizophrenia-spectrum disorders</b> |                         |                     |                     |                     |                     |                           |
| Fall-related injury                     | 2.1 [1.8; 2.4]          | 1.5 [0.8; 2.6]      | 2.0 [1.6; 2.5]      | 2.2 [1.7; 2.8]      | 1.7 [1.3; 2.3]      | 1.6 [1.0; 2.4]            |
| Transport-related injury                | 2.7 [2.1; 3.5]          | 1.0 [0.3; 3.7]      | 2.5 [1.6; 3.9]      | 2.1 [1.2; 3.7]      | 3.2 [1.6; 6.3]      | 14.6 [4.7; 45.2]          |
| Traumatic brain injury                  | 2.4 [2.0; 2.9]          | 1.0 [0.4; 2.3]      | 2.3 [1.7; 3.0]      | 2.2 [1.6; 3.1]      | 1.8 [1.2; 2.8]      | 3.9 [2.2; 6.9]            |
| Injury from interpersonal assault       | 2.0 [1.6; 2.5]          | 1.7 [0.6; 4.6]      | 1.2 [0.8; 1.9]      | 2.1 [1.3; 3.3]      | 2.4 [1.4; 4.0]      | 2.3 [0.8; 6.8]            |
| <b>Bipolar disorder</b>                 |                         |                     |                     |                     |                     |                           |
| Fall-related injury                     | 2.0 [1.6; 2.4]          | 1.1 [0.5; 2.3]      | 2.3 [1.6; 3.3]      | 1.8 [1.1; 2.9]      | 1.6 [1.1; 2.5]      | 1.8 [1.0; 2.9]            |
| Transport-related injury                | 2.9 [2.1; 4.1]          | 3.8 [1.2; 11.4]     | 2.2 [1.1; 4.5]      | 3.0 [1.6; 5.8]      | 4.3 [2.3; 8.1]      | 1.6 [0.2; 16.5]           |
| Traumatic brain injury                  | 2.9 [2.3; 3.7]          | 3.0 [1.3; 6.9]      | 2.9 [1.8; 4.7]      | 3.5 [2.2; 5.5]      | 3.0 [1.8; 5.0]      | 0.8 [0.3; 2.4]            |
| Injury from interpersonal assault       | 2.7 [1.9; 3.8]          | 1.6 [0.3; 8.8]      | 2.3 [1.1; 4.8]      | 3.6 [2.0; 6.4]      | 3.6 [1.7; 7.5]      | 3.9 [0.4; 39.6]           |
| <b>Depression</b>                       |                         |                     |                     |                     |                     |                           |
| Fall-related injury                     | 2.4 [2.1; 2.6]          | 2.5 [1.8; 3.4]      | 2.2 [1.8; 2.7]      | 2.3 [1.8; 2.9]      | 2.0 [1.6; 2.5]      | 2.0 [1.5; 2.6]            |
| Transport-related injury                | 2.4 [1.9; 2.9]          | 1.3 [0.7; 2.1]      | 1.9 [1.3; 2.7]      | 3.0 [2.0; 4.7]      | 2.8 [1.7; 4.4]      | 1.8 [0.8; 3.7]            |
| Traumatic brain injury                  | 2.6 [2.3; 3.0]          | 1.5 [0.9; 2.4]      | 2.1 [1.6; 2.7]      | 2.4 [1.8; 3.2]      | 2.6 [1.9; 3.5]      | 3.6 [2.4; 5.3]            |
| Injury from interpersonal assault       | 2.7 [2.3; 3.3]          | 1.9 [1.1; 3.2]      | 2.0 [1.4; 2.7]      | 3.3 [2.4; 4.7]      | 2.6 [1.6; 4.1]      | 3.2 [1.6; 6.5]            |
| <b>No psychiatric disorders</b>         |                         |                     |                     |                     |                     |                           |
| Fall-related injury                     | 6.9 [6.2; 7.6]          | 5.1 [4.0; 6.5]      | 5.6 [4.6; 6.8]      | 5.2 [4.0; 6.7]      | 8.1 [6.4; 10.3]     | 6.2 [4.8; 8.0]            |
| Transport-related injury                | 6.3 [5.4; 7.4]          | 6.0 [4.3; 8.5]      | 4.5 [3.2; 6.2]      | 6.9 [4.4; 10.6]     | 5.3 [3.2; 8.6]      | 7.9 [4.5; 13.6]           |
| Traumatic brain injury                  | 7.3 [6.4; 8.4]          | 5.2 [3.6; 7.4]      | 5.5 [4.2; 7.2]      | 7.7 [5.6; 10.8]     | 7.7 [5.5; 10.8]     | 9.8 [6.3; 15.1]           |
| Injury from interpersonal assault       | 7.6 [6.3; 9.3]          | 8.5 [5.2; 13.9]     | 7.2 [5.0; 10.3]     | 4.4 [2.6; 7.2]      | 11.5 [6.7; 19.7]    | 4.5 [1.7; 11.6]           |

Notes: The within-individual comparisons were adjusted for age, calendar month and all time-stable individual-level unmeasured confounders (e.g., genetic risks, early childhood environmental factors, and early-onset neurodevelopmental disorders). The psychiatric disorders were defined hierarchically.

eTable 4. Sensitivity test: Country-specific estimates

|                                         | <b>Pooled (reference)</b> | <b>Finland</b>      | <b>Sweden</b>       |
|-----------------------------------------|---------------------------|---------------------|---------------------|
|                                         | <b>aOR [95% CI]</b>       | <b>aOR [95% CI]</b> | <b>aOR [95% CI]</b> |
| <b>Schizophrenia-spectrum disorders</b> |                           |                     |                     |
| Fall-related injury                     | 2.1 [1.8; 2.4]            | 1.9 [1.5; 2.3]      | 2.3 [1.9; 2.7]      |
| Transport-related injury                | 2.7 [2.1; 3.5]            | 2.4 [1.6; 3.5]      | 2.9 [2.0; 4.2]      |
| Traumatic brain injury                  | 2.4 [2.0; 2.9]            | 2.6 [2.1; 3.3]      | 2.2 [1.7; 2.9]      |
| Injury from interpersonal assault       | 2.0 [1.6; 2.5]            | 2.3 [1.6; 3.1]      | 1.7 [1.2; 2.5]      |
| <b>Bipolar disorder</b>                 |                           |                     |                     |
| Fall-related injury                     | 2.0 [1.6; 2.4]            | 2.3 [1.7; 3.1]      | 1.8 [1.4; 2.4]      |
| Transport-related injury                | 2.9 [2.1; 4.1]            | 3.1 [1.9; 5.2]      | 2.8 [1.8; 4.4]      |
| Traumatic brain injury                  | 2.9 [2.3; 3.7]            | 2.6 [1.8; 3.7]      | 3.2 [2.3; 4.4]      |
| Injury from interpersonal assault       | 2.7 [1.9; 3.8]            | 2.5 [1.5; 4.2]      | 2.9 [1.9; 4.5]      |
| <b>Depression</b>                       |                           |                     |                     |
| Fall-related injury                     | 2.4 [2.1; 2.6]            | 2.5 [2.1; 2.9]      | 2.3 [2.0; 2.7]      |
| Transport-related injury                | 2.4 [1.9; 2.9]            | 2.2 [1.6; 3.1]      | 2.4 [1.9; 3.1]      |
| Traumatic brain injury                  | 2.6 [2.3; 3.0]            | 2.8 [2.3; 3.4]      | 2.4 [2.0; 2.9]      |
| Injury from interpersonal assault       | 2.7 [2.3; 3.3]            | 2.9 [2.2; 3.9]      | 2.6 [2.1; 3.3]      |
| <b>No psychiatric disorders</b>         |                           |                     |                     |
| Fall-related injury                     | 6.9 [6.2; 7.6]            | 4.5 [3.5; 5.8]      | 7.4 [6.7; 8.2]      |
| Transport-related injury                | 6.3 [5.4; 7.4]            | 4.8 [3.1; 7.4]      | 6.6 [5.5; 7.9]      |
| Traumatic brain injury                  | 7.3 [6.4; 8.4]            | 6.3 [4.7; 8.4]      | 7.6 [6.5; 8.9]      |
| Injury from interpersonal assault       | 7.6 [6.3; 9.3]            | 8.7 [6.2; 12.3]     | 7.2 [5.6; 9.1]      |

Notes: The within-individual comparisons were adjusted for age, calendar month and all time-stable individual-level unmeasured confounders (e.g., genetic risks, early childhood environmental factors, and early-onset neurodevelopmental disorders). The psychiatric disorders were defined hierarchically.



**eTable 5. Sensitivity test: Each control period for each individual was randomly moved forward for a period of between 0 and 14 days to test for potential within-month seasonality bias**

|                                         | Main analysis (reference) | Random start dates for the control periods |
|-----------------------------------------|---------------------------|--------------------------------------------|
|                                         | aOR [95% CI]              | aOR [95% CI]                               |
| <b>Schizophrenia-spectrum disorders</b> |                           |                                            |
| Fall-related injury                     | 2.1 [1.8; 2.4]            | 2.1 [1.8; 2.3]                             |
| Transport-related injury                | 2.7 [2.1; 3.5]            | 2.9 [2.2; 3.8]                             |
| Traumatic brain injury                  | 2.4 [2.0; 2.9]            | 2.4 [2.1; 2.9]                             |
| Injury from interpersonal assault       | 2.0 [1.6; 2.5]            | 2.1 [1.7; 2.7]                             |
| <b>Bipolar disorder</b>                 |                           |                                            |
| Fall-related injury                     | 2.0 [1.6; 2.4]            | 2.0 [1.6; 2.4]                             |
| Transport-related injury                | 2.9 [2.1; 4.1]            | 2.9 [2.1; 4.1]                             |
| Traumatic brain injury                  | 2.9 [2.3; 3.7]            | 2.9 [2.3; 3.7]                             |
| Injury from interpersonal assault       | 2.7 [1.9; 3.8]            | 2.6 [1.9; 3.7]                             |
| <b>Depression</b>                       |                           |                                            |
| Fall-related injury                     | 2.4 [2.1; 2.6]            | 2.3 [2.1; 2.6]                             |
| Transport-related injury                | 2.4 [1.9; 2.9]            | 2.4 [1.9; 2.9]                             |
| Traumatic brain injury                  | 2.6 [2.3; 3.0]            | 2.5 [2.2; 2.9]                             |
| Injury from interpersonal assault       | 2.7 [2.3; 3.3]            | 2.5 [2.1; 3.0]                             |
| <b>No psychiatric disorders</b>         |                           |                                            |
| Fall-related injury                     | 6.9 [6.2; 7.6]            | 6.5 [5.9; 7.1]                             |
| Transport-related injury                | 6.3 [5.4; 7.4]            | 6.4 [5.4; 7.5]                             |
| Traumatic brain injury                  | 7.3 [6.4; 8.4]            | 7.8 [6.8; 8.9]                             |
| Injury from interpersonal assault       | 7.6 [6.3; 9.3]            | 8.0 [6.6; 9.8]                             |

*Notes: The within-individual comparisons were adjusted for age, calendar month and all time-stable individual-level unmeasured confounders (e.g., genetic risks, early childhood environmental factors, and early-onset neurodevelopmental disorders). The psychiatric disorders were defined hierarchically.*

**eTable 6. Adjusted odds ratios of self-harm in the week following exposure to any of the triggers (e.g., fall-related accident, transport-related accident, traumatic brain injury, and violent victimisation) compared to later unexposed periods within the same person, stratified by psychiatric diagnostic categories (e.g., schizophrenia-spectrum disorder, bipolar disorder, depression, and those without psychiatric disorders)**

|                                         | Control periods that occurred up to three years before the trigger event (reference) | Control periods that occurred up to three years after the trigger event |
|-----------------------------------------|--------------------------------------------------------------------------------------|-------------------------------------------------------------------------|
|                                         | aOR [95% CI]                                                                         | aOR [95% CI]                                                            |
| <b>Schizophrenia-spectrum disorders</b> |                                                                                      |                                                                         |
| Fall-related injury                     | 2.1 [1.8; 2.4]                                                                       | 2.2 [1.8; 2.8]                                                          |
| Transport-related injury                | 2.7 [2.1; 3.5]                                                                       | 2.8 [2.1; 3.8]                                                          |
| Traumatic brain injury                  | 2.4 [2.0; 2.9]                                                                       | 2.7 [2.1; 3.4]                                                          |
| Injury from interpersonal assault       | 2.0 [1.6; 2.5]                                                                       | 2.6 [2.0; 3.5]                                                          |
| <b>Bipolar disorder</b>                 |                                                                                      |                                                                         |
| Fall-related injury                     | 2.0 [1.6; 2.4]                                                                       | 2.7 [2.1; 3.6]                                                          |
| Transport-related injury                | 2.9 [2.1; 4.1]                                                                       | 3.5 [2.3; 5.4]                                                          |
| Traumatic brain injury                  | 2.9 [2.3; 3.7]                                                                       | 2.9 [2.1; 3.9]                                                          |
| Injury from interpersonal assault       | 2.7 [1.9; 3.8]                                                                       | 2.5 [1.7; 3.9]                                                          |
| <b>Depression</b>                       |                                                                                      |                                                                         |
| Fall-related injury                     | 2.4 [2.1; 2.6]                                                                       | 3.0 [2.6; 3.5]                                                          |
| Transport-related injury                | 2.4 [1.9; 2.9]                                                                       | 2.6 [2.1; 3.3]                                                          |
| Traumatic brain injury                  | 2.6 [2.3; 3.0]                                                                       | 2.6 [2.1; 3.1]                                                          |
| Injury from interpersonal assault       | 2.7 [2.3; 3.3]                                                                       | 2.6 [2.1; 3.3]                                                          |
| <b>No psychiatric disorders</b>         |                                                                                      |                                                                         |
| Fall-related injury                     | 6.9 [6.2; 7.6]                                                                       | 6.7 [6.0; 7.6]                                                          |
| Transport-related injury                | 6.3 [5.4; 7.4]                                                                       | 4.3 [3.5; 5.3]                                                          |
| Traumatic brain injury                  | 7.3 [6.4; 8.4]                                                                       | 6.2 [5.2; 7.3]                                                          |
| Injury from interpersonal assault       | 7.6 [6.3; 9.3]                                                                       | 7.6 [6.0; 9.5]                                                          |

*Notes: The within-individual comparisons were adjusted for age, calendar month and all time-stable individual-level unmeasured confounders (e.g., genetic risks, early childhood environmental factors, and early-onset neurodevelopmental disorders). The psychiatric disorders were defined hierarchically.*

eTable 7. Sensitivity test: Limiting the control periods to 12 months instead of 36 months per person.

|                                         | 36 months (reference) | 12 months      |
|-----------------------------------------|-----------------------|----------------|
|                                         | aOR [95% CI]          | aOR [95% CI]   |
| <b>Schizophrenia-spectrum disorders</b> |                       |                |
| Fall-related injury                     | 2.1 [1.8; 2.4]        | 1.8 [1.6; 2.0] |
| Transport-related injury                | 2.7 [2.1; 3.5]        | 2.5 [1.9; 3.4] |
| Traumatic brain injury                  | 2.4 [2.0; 2.9]        | 2.1 [1.7; 2.5] |
| Injury from interpersonal assault       | 2.0 [1.6; 2.5]        | 1.7 [1.3; 2.2] |
| <b>Bipolar disorder</b>                 |                       |                |
| Fall-related injury                     | 2.0 [1.6; 2.4]        | 1.8 [1.5; 2.2] |
| Transport-related injury                | 2.9 [2.1; 4.1]        | 2.6 [1.8; 3.7] |
| Traumatic brain injury                  | 2.9 [2.3; 3.7]        | 2.5 [1.9; 3.2] |
| Injury from interpersonal assault       | 2.7 [1.9; 3.8]        | 2.2 [1.5; 3.1] |
| <b>Depression</b>                       |                       |                |
| Fall-related injury                     | 2.4 [2.1; 2.6]        | 2.1 [1.8; 2.3] |
| Transport-related injury                | 2.4 [1.9; 2.9]        | 2.0 [1.6; 2.4] |
| Traumatic brain injury                  | 2.6 [2.3; 3.0]        | 2.3 [2.0; 2.6] |
| Injury from interpersonal assault       | 2.7 [2.3; 3.3]        | 2.4 [2.0; 2.9] |
| <b>No psychiatric disorders</b>         |                       |                |
| Fall-related injury                     | 6.9 [6.2; 7.6]        | 5.5 [5.0; 6.1] |
| Transport-related injury                | 6.3 [5.4; 7.4]        | 5.2 [4.4; 6.2] |
| Traumatic brain injury                  | 7.3 [6.4; 8.4]        | 6.3 [5.4; 7.3] |
| Injury from interpersonal assault       | 7.6 [6.3; 9.3]        | 6.5 [5.3; 8.1] |

Notes: The within-individual comparisons were adjusted for age, calendar month and all time-stable individual-level unmeasured confounders (e.g., genetic risks, early childhood environmental factors, and early-onset neurodevelopmental disorders). The psychiatric disorders were defined hierarchically.

eTable 8. Sensitivity test: Limiting the analyses to the first trigger event instead of all trigger events throughout the follow-up period

|                                         | All trigger events<br>(reference) | First trigger event |
|-----------------------------------------|-----------------------------------|---------------------|
|                                         | aOR [95% CI]                      | aOR [95% CI]        |
| <b>Schizophrenia-spectrum disorders</b> |                                   |                     |
| Fall-related injury                     | 2.1 [1.8; 2.4]                    | 2.0 [1.6; 2.5]      |
| Transport-related injury                | 2.7 [2.1; 3.5]                    | 3.1 [2.2; 4.4]      |
| Traumatic brain injury                  | 2.4 [2.0; 2.9]                    | 2.4 [1.9; 3.2]      |
| Injury from interpersonal assault       | 2.0 [1.6; 2.5]                    | 2.0 [1.5; 2.8]      |
| <b>Bipolar disorder</b>                 |                                   |                     |
| Fall-related injury                     | 2.0 [1.6; 2.4]                    | 2.0 [1.5; 2.7]      |
| Transport-related injury                | 2.9 [2.1; 4.1]                    | 2.8 [1.8; 4.4]      |
| Traumatic brain injury                  | 2.9 [2.3; 3.7]                    | 2.6 [1.8; 3.8]      |
| Injury from interpersonal assault       | 2.7 [1.9; 3.8]                    | 1.7 [1.1; 2.8]      |
| <b>Depression</b>                       |                                   |                     |
| Fall-related injury                     | 2.4 [2.1; 2.6]                    | 2.7 [2.3; 3.1]      |
| Transport-related injury                | 2.4 [1.9; 2.9]                    | 2.3 [1.8; 3.0]      |
| Traumatic brain injury                  | 2.6 [2.3; 3.0]                    | 2.5 [2.1; 3.1]      |
| Injury from interpersonal assault       | 2.7 [2.3; 3.3]                    | 2.2 [1.7; 2.8]      |
| <b>No psychiatric disorders</b>         |                                   |                     |
| Fall-related injury                     | 6.9 [6.2; 7.6]                    | 7.4 [6.5; 8.6]      |
| Transport-related injury                | 6.3 [5.4; 7.4]                    | 6.7 [5.3; 8.3]      |
| Traumatic brain injury                  | 7.3 [6.4; 8.4]                    | 7.8 [6.4; 9.4]      |
| Injury from interpersonal assault       | 7.6 [6.3; 9.3]                    | 7.0 [5.4; 9.1]      |

Notes: The within-individual comparisons were adjusted for age, calendar month and all time-stable individual-level unmeasured confounders (e.g., genetic risks, early childhood environmental factors, and early-onset neurodevelopmental disorders). The psychiatric disorders were defined hierarchically.

**eTable 9. Sensitivity test: Restricting the definitions of the psychiatric disorders to patients who were diagnosed with the conditions at two separate occasions or those who were only diagnosed in inpatient care settings**

|                                         | Main analysis (reference) | At least 2 diagnoses on separate occasions | Inpatient care only |
|-----------------------------------------|---------------------------|--------------------------------------------|---------------------|
|                                         | aOR [95% CI]              | aOR [95% CI]                               | aOR [95% CI]        |
| <b>Schizophrenia-spectrum disorders</b> |                           |                                            |                     |
| Fall-related injury                     | 2.1 [1.8; 2.4]            | 2.2 [1.9; 2.5]                             | 2.1 [1.8; 2.5]      |
| Transport-related injury                | 2.7 [2.1; 3.5]            | 2.7 [2.0; 3.7]                             | 2.7 [2.0; 3.6]      |
| Traumatic brain injury                  | 2.4 [2.0; 2.9]            | 2.7 [2.2; 3.2]                             | 2.4 [2.0; 2.9]      |
| Injury from interpersonal assault       | 2.0 [1.6; 2.5]            | 2.0 [1.5; 2.7]                             | 1.9 [1.5; 2.5]      |
| <b>Bipolar disorder</b>                 |                           |                                            |                     |
| Fall-related injury                     | 2.0 [1.6; 2.4]            | 1.9 [1.5; 2.4]                             | 1.9 [1.5; 2.3]      |
| Transport-related injury                | 2.9 [2.1; 4.1]            | 2.7 [1.8; 3.9]                             | 3.1 [2.1; 4.6]      |
| Traumatic brain injury                  | 2.9 [2.3; 3.7]            | 2.6 [2.0; 3.5]                             | 2.7 [2.1; 3.6]      |
| Injury from interpersonal assault       | 2.7 [1.9; 3.8]            | 2.4 [1.6; 3.5]                             | 2.8 [1.9; 4.2]      |
| <b>Depression</b>                       |                           |                                            |                     |
| Fall-related injury                     | 2.4 [2.1; 2.6]            | 2.3 [2.1; 2.6]                             | 2.3 [2.0; 2.5]      |
| Transport-related injury                | 2.4 [1.9; 2.9]            | 2.5 [2.1; 3.1]                             | 2.1 [1.7; 2.7]      |
| Traumatic brain injury                  | 2.6 [2.3; 3.0]            | 2.4 [2.0; 2.7]                             | 2.5 [2.2; 3.0]      |
| Injury from interpersonal assault       | 2.7 [2.3; 3.3]            | 2.4 [2.0; 3.0]                             | 2.5 [2.1; 3.1]      |

*Notes: The within-individual comparisons were adjusted for age, calendar month and all time-stable individual-level unmeasured confounders (e.g., genetic risks, early childhood environmental factors, and early-onset neurodevelopmental disorders). The psychiatric disorders were defined hierarchically.*

eTable 10. Sensitivity test: Examining the alternative outcome measure of suicidal behaviours (i.e., either self-harm or completed suicide)

|                                         | Self-harm (reference) | Suicidal behaviors |
|-----------------------------------------|-----------------------|--------------------|
|                                         | aOR [95% CI]          | aOR [95% CI]       |
| <b>Schizophrenia-spectrum disorders</b> |                       |                    |
| Fall-related injury                     | 2.1 [1.8; 2.4]        | 2.1 [1.8; 2.4]     |
| Transport-related injury                | 2.7 [2.1; 3.5]        | 2.7 [2.1; 3.5]     |
| Traumatic brain injury                  | 2.4 [2.0; 2.9]        | 2.4 [2.1; 2.9]     |
| Injury from interpersonal assault       | 2.0 [1.6; 2.5]        | 2.0 [1.6; 2.5]     |
| <b>Bipolar disorder</b>                 |                       |                    |
| Fall-related injury                     | 2.0 [1.6; 2.4]        | 2.0 [1.7; 2.5]     |
| Transport-related injury                | 2.9 [2.1; 4.1]        | 3.1 [2.2; 4.3]     |
| Traumatic brain injury                  | 2.9 [2.3; 3.7]        | 3.0 [2.4; 3.8]     |
| Injury from interpersonal assault       | 2.7 [1.9; 3.8]        | 2.7 [1.9; 3.8]     |
| <b>Depression</b>                       |                       |                    |
| Fall-related injury                     | 2.4 [2.1; 2.6]        | 2.4 [2.2; 2.7]     |
| Transport-related injury                | 2.4 [1.9; 2.9]        | 2.4 [2.0; 3.0]     |
| Traumatic brain injury                  | 2.6 [2.3; 3.0]        | 2.6 [2.3; 3.0]     |
| Injury from interpersonal assault       | 2.7 [2.3; 3.3]        | 2.7 [2.3; 3.3]     |
| <b>No psychiatric disorders</b>         |                       |                    |
| Fall-related injury                     | 6.9 [6.2; 7.6]        | 7.1 [6.5; 7.8]     |
| Transport-related injury                | 6.3 [5.4; 7.4]        | 6.5 [5.5; 7.6]     |
| Traumatic brain injury                  | 7.3 [6.4; 8.4]        | 7.6 [6.7; 8.7]     |
| Injury from interpersonal assault       | 7.6 [6.3; 9.3]        | 7.7 [6.4; 9.4]     |

Notes: The within-individual comparisons were adjusted for age, calendar month and all time-stable individual-level unmeasured confounders (e.g., genetic risks, early childhood environmental factors, and early-onset neurodevelopmental disorders). The psychiatric disorders were defined hierarchically.

**eTable 11. Sensitivity test: Testing for reverse causation bias by excluding trigger events that were preceded by self-harm up to three months earlier**

|                                         | All triggers (reference) | Excluding triggers that were preceded by self-harm up to 3 months earlier |
|-----------------------------------------|--------------------------|---------------------------------------------------------------------------|
|                                         | aOR [95% CI]             | aOR [95% CI]                                                              |
| <b>Schizophrenia-spectrum disorders</b> |                          |                                                                           |
| Fall-related injury                     | 2.1 [1.8; 2.4]           | 2.4 [2.1; 2.8]                                                            |
| Transport-related injury                | 2.7 [2.1; 3.5]           | 3.6 [2.7; 4.7]                                                            |
| Traumatic brain injury                  | 2.4 [2.0; 2.9]           | 3.1 [2.6; 3.8]                                                            |
| Injury from interpersonal assault       | 2.0 [1.6; 2.5]           | 2.5 [1.9; 3.3]                                                            |
| <b>Bipolar disorder</b>                 |                          |                                                                           |
| Fall-related injury                     | 2.0 [1.6; 2.4]           | 2.3 [1.9; 2.9]                                                            |
| Transport-related injury                | 2.9 [2.1; 4.1]           | 3.5 [2.4; 5.1]                                                            |
| Traumatic brain injury                  | 2.9 [2.3; 3.7]           | 3.5 [2.7; 4.5]                                                            |
| Injury from interpersonal assault       | 2.7 [1.9; 3.8]           | 3.3 [2.3; 4.8]                                                            |
| <b>Depression</b>                       |                          |                                                                           |
| Fall-related injury                     | 2.4 [2.1; 2.6]           | 2.7 [2.4; 3.1]                                                            |
| Transport-related injury                | 2.4 [1.9; 2.9]           | 2.8 [2.3; 3.5]                                                            |
| Traumatic brain injury                  | 2.6 [2.3; 3.0]           | 3.2 [2.7; 3.7]                                                            |
| Injury from interpersonal assault       | 2.7 [2.3; 3.3]           | 3.2 [2.6; 3.9]                                                            |
| <b>No psychiatric disorders</b>         |                          |                                                                           |
| Fall-related injury                     | 6.9 [6.2; 7.6]           | 8.2 [7.4; 9.1]                                                            |
| Transport-related injury                | 6.3 [5.4; 7.4]           | 7.8 [6.6; 9.2]                                                            |
| Traumatic brain injury                  | 7.3 [6.4; 8.4]           | 8.7 [7.5; 10.0]                                                           |
| Injury from interpersonal assault       | 7.6 [6.3; 9.3]           | 8.9 [7.3; 10.9]                                                           |

Notes: The within-individual comparisons were adjusted for age, calendar month and all time-stable individual-level unmeasured confounders (e.g., genetic risks, early childhood environmental factors, and early-onset neurodevelopmental disorders). The psychiatric disorders were defined hierarchically.

**eTable 12. Sensitivity test: Testing for left truncation bias by including cohorts who were 12 years old or younger when the self-harm data were made available (Finland: 1975-2000; Sweden: 1961-1993)**

|                                         | All cohorts (reference) | No left truncation bias |
|-----------------------------------------|-------------------------|-------------------------|
|                                         | aOR [95% CI]            | aOR [95% CI]            |
| <b>Schizophrenia-spectrum disorders</b> |                         |                         |
| Fall-related injury                     | 2.1 [1.8; 2.4]          | 2.0 [1.7; 2.4]          |
| Transport-related injury                | 2.7 [2.1; 3.5]          | 2.2 [1.6; 3.1]          |
| Traumatic brain injury                  | 2.4 [2.0; 2.9]          | 2.3 [1.8; 2.8]          |
| Injury from interpersonal assault       | 2.0 [1.6; 2.5]          | 1.7 [1.2; 2.3]          |
| <b>Bipolar disorder</b>                 |                         |                         |
| Fall-related injury                     | 2.0 [1.6; 2.4]          | 2.0 [1.5; 2.5]          |
| Transport-related injury                | 2.9 [2.1; 4.1]          | 2.5 [1.6; 3.8]          |
| Traumatic brain injury                  | 2.9 [2.3; 3.7]          | 2.9 [2.1; 4.1]          |
| Injury from interpersonal assault       | 2.7 [1.9; 3.8]          | 2.1 [1.3; 3.4]          |
| <b>Depression</b>                       |                         |                         |
| Fall-related injury                     | 2.4 [2.1; 2.6]          | 2.4 [2.1; 2.8]          |
| Transport-related injury                | 2.4 [1.9; 2.9]          | 2.2 [1.8; 2.8]          |
| Traumatic brain injury                  | 2.6 [2.3; 3.0]          | 2.3 [2.0; 2.8]          |
| Injury from interpersonal assault       | 2.7 [2.3; 3.3]          | 2.6 [2.1; 3.2]          |
| <b>No psychiatric disorders</b>         |                         |                         |
| Fall-related injury                     | 6.9 [6.2; 7.6]          | 6.8 [6.0; 7.7]          |
| Transport-related injury                | 6.3 [5.4; 7.4]          | 6.1 [5.1; 7.5]          |
| Traumatic brain injury                  | 7.3 [6.4; 8.4]          | 6.5 [5.4; 7.8]          |
| Injury from interpersonal assault       | 7.6 [6.3; 9.3]          | 8.9 [6.9; 11.4]         |

*Notes: The within-individual comparisons were adjusted for age, calendar month and all time-stable individual-level unmeasured confounders (e.g., genetic risks, early childhood environmental factors, and early-onset neurodevelopmental disorders). The psychiatric disorders were defined hierarchically.*



eTable 13. Sensitivity test: Excluding self-harm events of undetermined intent

|                                         | Any self-harm (reference) | Excluding self-harm events of undetermined intent |
|-----------------------------------------|---------------------------|---------------------------------------------------|
|                                         | aOR [95% CI]              | aOR [95% CI]                                      |
| <b>Schizophrenia-spectrum disorders</b> |                           |                                                   |
| Fall-related injury                     | 2.1 [1.8; 2.4]            | 1.8 [1.6; 2.1]                                    |
| Transport-related injury                | 2.7 [2.1; 3.5]            | 2.6 [2.0; 3.5]                                    |
| Traumatic brain injury                  | 2.4 [2.0; 2.9]            | 2.1 [1.7; 2.5]                                    |
| Injury from interpersonal assault       | 2.0 [1.6; 2.5]            | 1.5 [1.1; 2.1]                                    |
| <b>Bipolar disorder</b>                 |                           |                                                   |
| Fall-related injury                     | 2.0 [1.6; 2.4]            | 1.9 [1.5; 2.3]                                    |
| Transport-related injury                | 2.9 [2.1; 4.1]            | 2.7 [1.9; 3.9]                                    |
| Traumatic brain injury                  | 2.9 [2.3; 3.7]            | 2.7 [2.1; 3.5]                                    |
| Injury from interpersonal assault       | 2.7 [1.9; 3.8]            | 2.3 [1.6; 3.4]                                    |
| <b>Depression</b>                       |                           |                                                   |
| Fall-related injury                     | 2.4 [2.1; 2.6]            | 2.2 [2.0; 2.5]                                    |
| Transport-related injury                | 2.4 [1.9; 2.9]            | 2.1 [1.7; 2.6]                                    |
| Traumatic brain injury                  | 2.6 [2.3; 3.0]            | 2.3 [2.0; 2.7]                                    |
| Injury from interpersonal assault       | 2.7 [2.3; 3.3]            | 2.1 [1.7; 2.6]                                    |
| <b>No psychiatric disorders</b>         |                           |                                                   |
| Fall-related injury                     | 6.9 [6.2; 7.6]            | 3.0 [2.4; 3.8]                                    |
| Transport-related injury                | 6.3 [5.4; 7.4]            | 2.8 [2.0; 4.0]                                    |
| Traumatic brain injury                  | 7.3 [6.4; 8.4]            | 3.7 [2.9; 4.8]                                    |
| Injury from interpersonal assault       | 7.6 [6.3; 9.3]            | 3.9 [2.8; 5.6]                                    |

Notes: The within-individual comparisons were adjusted for age, calendar month and all time-stable individual-level unmeasured confounders (e.g., genetic risks, early childhood environmental factors, and early-onset neurodevelopmental disorders). The psychiatric disorders were defined hierarchically.
